# Supplementary material for: Ordinary kriging vs inverse distance weighting: spatial interpolation of the sessile community of Madagascar reef, Gulf of Mexico
Source: PeerJ. 2017 Nov 30;5:e4078. doi: 10.7717/peerj.4078 (PMC5712470; doi:10.7717/peerj.4078)
Supplement: Data S1 — Percent cover of hard corals, octocorals, macroalgae, sponges and zoanthids inhabiting Madagascar reef, Gulf of Mexico. [file peerj-05-4078-s003.xlsx]

## Sheet: Sheet1
Quadrat ID	Date	Reef Region	Depth	Scleractinians	Millepora	Hard Corals	Octocorals	Macroalgae	Sponges	Zoanthids
1	Septiembre 6	Windward	20.8	0.0769231	0	0.0769231	0.0769231	0	0	0
2	Septiembre 6	Windward	20.6	0.0769231	0	0.0769231	0	0	0	0
3	Septiembre 6	Windward	20.6	0	0	0	0	0	0	0
4	Septiembre 6	Windward	20.4	0	0	0	0.0769231	0.0769231	0	0
5	Septiembre 6	Windward	20.3	0	0	0	0	0.615385	0	0
6	Septiembre 6	Windward	19.4	0	0	0	0	0.846154	0	0
7	Septiembre 6	Windward	19.7	0	0	0	0	0.846154	0	0
8	Septiembre 6	Windward	19.6	0	0	0	0	0.769231	0	0
9	Septiembre 6	Windward	19.3	0	0	0	0	0.846154	0	0
10	Septiembre 6	Windward	20.2	0	0	0	0	1	0	0
11	Septiembre 6	Windward	20.8	0.0769231	0	0.0769231	0.0769231	0	0	0
12	Septiembre 24	Windward	20.2	0	0	0	0.0769231	0.692308	0	0
13	Septiembre 24	Windward	20.4	0	0	0	0.153846	0.538462	0	0
14	Septiembre 24	Windward	20.3	0	0	0	0.0769231	0.615385	0	0
15	Septiembre 24	Windward	20.3	0	0	0	0	0.384615	0	0
16	Septiembre 24	Windward	20.1	0	0	0	0	0.384615	0	0
17	Septiembre 24	Windward	19.5	0	0	0	0.0769231	0.615385	0	0
18	Septiembre 24	Windward	17.7	0	0	0	0	0.692308	0	0
19	Septiembre 24	Windward	17.3	0	0	0	0.0769231	0.692308	0	0
20	Septiembre 24	Windward	16.6	0	0	0	0.230769	0.615385	0	0
21	Septiembre 24	Windward	15.7	0	0	0	0.230769	0.615385	0	0
22	Septiembre 24	Windward	14.9	0.0769231	0	0.0769231	0.230769	0.538462	0	0
23	Septiembre 24	Windward	14.1	0	0	0	0.230769	0.615385	0	0
24	Septiembre 24	Windward	13.7	0	0	0	0.307692	0.384615	0	0
25	Septiembre 24	Windward	13.3	0	0	0	0.0769231	0.615385	0	0
26	Septiembre 24	Windward	12	0	0.0769231	0.0769231	0.384615	0.384615	0	0
27	Septiembre 24	Windward	10.8	0	0	0	0.769231	0.0769231	0	0
28	Septiembre 24	Crest	7.9	0	0	0	0.538462	0.384615	0.0769231	0
29	Septiembre 24	Crest	8.3	0	0.153846	0.153846	0.384615	0.307692	0.1538	0
30	Septiembre 24	Crest	9.1	0	0.0769231	0.0769231	0.692308	0.153846	0	0.0769231
31	Septiembre 24	Leeward	10.9	0	0.384615	0.384615	0.230769	0.384615	0	0
32	Septiembre 24	Leeward	12.2	0	0.230769	0.230769	0.230769	0.384615	0.0769231	0
33	Septiembre 24	Leeward	13.5	0	0.0769231	0.0769231	0.230769	0.615385	0	0
34	Septiembre 24	Leeward	13.9	0	0	0	0.230769	0.769231	0	0
35	Septiembre 24	Leeward	14.5	0	0	0	0.230769	0.538462	0.0769231	0
36	Septiembre 24	Leeward	15.9	0	0	0	0.384615	0.461538	0	0
37	Septiembre 24	Leeward	14.7	0	0	0	0	0.230769	0	0
38	Septiembre 24	Leeward	15.2	0	0	0	0	0.307692	0	0
39	Septiembre 24	Leeward	16.8	0	0	0	0	0.769231	0	0
40	Septiembre 24	Leeward	18.5	0	0	0	0.153846	0.769231	0	0
41	Septiembre 24	Leeward	18.6	0	0	0	0.0769231	0.769231	0	0
42	Septiembre 24	Leeward	18.8	0	0	0	0.0769231	0.615385	0	0
43	Septiembre 24	Leeward	18.9	0	0	0	0	0.923077	0	0
44	Septiembre 24	Leeward	19.5	0	0	0	0	0.538462	0	0
45	Septiembre 24	Leeward	19.3	0	0	0	0.0769231	0.769231	0	0
46	Septiembre 24	Leeward	19.4	0	0	0	0.0769231	0.769231	0	0
47	Septiembre 24	Leeward	19.3	0	0	0	0.153846	0.692308	0	0
48	Septiembre 24	Leeward	19.4	0	0	0	0.0769231	0.769231	0	0
49	Agosto 28	Windward	19.7	0	0	0	0	0.769231	0	0
50	Agosto 28	Windward	19.7	0	0	0	0	0.615385	0	0
51	Agosto 28	Windward	19.5	0.0769231	0	0.0769231	0	0.615385	0	0
52	Agosto 28	Windward	19.5	0	0	0	0	0.692308	0	0
53	Agosto 28	Windward	19.3	0	0	0	0	0.615385	0	0
54	Agosto 28	Windward	19.1	0	0	0	0	0.307692	0	0
55	Agosto 28	Windward	18.7	0	0	0	0	0.538462	0	0
56	Agosto 28	Windward	18	0	0	0	0	0.615385	0	0
57	Agosto 28	Windward	17	0	0	0	0.0769231	0.615385	0	0
58	Agosto 28	Windward	16.2	0	0	0	0.0769231	0.538462	0.0769231	0
59	Agosto 28	Windward	13.3	0.0769231	0	0.0769231	0.230769	0.692308	0	0
60	Agosto 28	Windward	11.8	0	0	0	0	1	0	0
61	Agosto 28	Windward	9.9	0.153846	0	0.153846	0.153846	0.692308	0	0
62	Agosto 28	Crest	7.6	0	0	0	0.307692	0.384615	0.2308	0
63	Agosto 28	Crest	6.9	0	0	0	0.384615	0.230769	0.1538	0.230769
64	Agosto 28	Crest	7.7	0	0	0	0.307692	0.384615	0.0769231	0.230769
65	Agosto 28	Crest	6.8	0	0	0	0.384615	0.384615	0.230723	0
66	Agosto 28	Crest	6.7	0	0	0	0.307692	0.615385	0.0769231	0
67	Agosto 28	Crest	7.3	0	0.0769231	0.0769231	0.384615	0.384615	0.153846	0
68	Agosto 28	Crest	7.7	0	0	0	0.461538	0.307692	0.0769231	0.153846
69	Agosto 28	Crest	8.6	0	0.153846	0.153846	0.384615	0.230769	0.0769231	0.153846
70	Agosto 28	Leeward	10.4	0.0769231	0.0769231	0.153846	0.153846	0.384615	0.0769231	0
71	Agosto 28	Leeward	11.6	0	0	0	0.384615	0.384615	0	0
72	Agosto 28	Leeward	12.2	0	0	0	0.230769	0.461538	0.0769231	0
73	Agosto 28	Leeward	12.6	0	0	0	0	0.846154	0	0
74	Agosto 28	Leeward	13.6	0	0	0	0.230769	0.615385	0	0
75	Agosto 28	Leeward	14.2	0	0	0	0.153846	0.538462	0	0
76	Agosto 28	Leeward	15.5	0	0	0	0.307692	0.384615	0.0769231	0
77	Agosto 28	Leeward	15.5	0	0	0	0.0769231	0.846154	0	0
78	Agosto 28	Leeward	16.2	0	0	0	0.0769231	0.769231	0.0769231	0
79	Agosto 28	Leeward	16.9	0	0	0	0.0769231	0.846154	0	0
80	Agosto 28	Leeward	18.1	0	0	0	0	0.615385	0	0
81	Agosto 28	Leeward	18.1	0	0	0	0	0.769231	0	0
82	Agosto 28	Leeward	18.2	0	0	0	0	0.769231	0	0
83	Agosto 28	Leeward	18.2	0	0	0	0	0.846154	0	0
84	Agosto 28	Leeward	18.1	0	0	0	0.153846	0.615385	0	0
85	Agosto 28	Leeward	18.4	0	0	0	0	0.923077	0	0
86	Agosto 28	Leeward	18.4	0	0	0	0.153846	0.692308	0	0
87	Septiembre 20	Windward	19.2	0.0769231	0	0.0769231	0.0769231	0.692308	0	0
88	Septiembre 20	Windward	19.1	0	0	0	0	0.461538	0	0
89	Septiembre 20	Windward	18.4	0	0	0	0	0.846154	0	0
90	Septiembre 20	Windward	18.4	0	0	0	0	0.538462	0.0769231	0
91	Septiembre 20	Windward	17.9	0	0	0	0	0.692308	0	0
92	Septiembre 20	Windward	17.7	0.0769231	0	0.0769231	0	0.769231	0	0
93	Septiembre 20	Windward	17.2	0	0	0	0.0769231	0.846154	0	0
94	Septiembre 20	Windward	17.3	0	0	0	0.0769231	0.615385	0	0
95	Septiembre 20	Windward	17.1	0	0	0	0.153846	0.538462	0	0
96	Septiembre 20	Windward	16.8	0	0	0	0	0.538462	0	0
97	Septiembre 20	Windward	15.4	0	0	0	0.0769231	0.538462	0	0
98	Septiembre 20	Windward	12.3	0	0.0769231	0.0769231	0.307692	0.538462	0.0769231	0
99	Septiembre 20	Windward	12.3	0	0	0	0	0.615385	0.0769231	0
100	Septiembre 20	Windward	11.7	0	0	0	0.0769231	0.0769231	0	0
101	Septiembre 20	Crest	7.9	0	0	0	0.461538	0.461538	0	0.0769231
102	Septiembre 20	Crest	6.9	0	0.0769231	0.0769231	0.461538	0.153846	0.2308	0.0769231
103	Septiembre 20	Crest	6.5	0	0	0	0.461538	0.384615	0.0769231	0
104	Septiembre 20	Crest	5.6	0	0	0	0.153846	0.538462	0.3077	0
105	Septiembre 20	Crest	5.5	0	0	0	0.230769	0.769231	0	0
106	Septiembre 20	Crest	5	0	0	0	0.153846	0.538462	0	0.307692
107	Septiembre 20	Crest	6.1	0	0	0	0.384615	0.307692	0	0.230769
108	Septiembre 20	Crest	5.1	0	0	0	0	0.846154	0.1538	0
109	Septiembre 20	Crest	5.1	0	0	0	0.0769231	0.615385	0.1538	0.153846
110	Septiembre 20	Crest	6.7	0	0	0	0.0769231	0.692308	0.153846	0
111	Septiembre 20	Crest	8.3	0	0	0	0.615385	0.230769	0.0769231	0
112	Septiembre 20	Crest	6.3	0	0	0	0.384615	0.538462	0	0
113	Septiembre 20	Crest	7.1	0	0	0	0.461538	0.307692	0	0
114	Septiembre 20	Crest	8.4	0	0	0	0.538462	0.230769	0.0769231	0
115	Septiembre 20	Leeward	9.9	0	0	0	0.384615	0.0769231	0	0
116	Septiembre 20	Leeward	11.5	0	0	0	0.384615	0.384615	0	0
117	Septiembre 20	Leeward	12.6	0	0	0	0.230769	0.384615	0	0
118	Septiembre 20	Leeward	13.7	0	0	0	0.153846	0.615385	0	0
119	Septiembre 20	Leeward	14.3	0	0	0	0.153846	0.615385	0	0
120	Septiembre 20	Leeward	14.7	0	0	0	0.230769	0.615384	0.0769231	0
121	Septiembre 20	Leeward	15.2	0	0	0	0.153846	0.692308	0	0
122	Septiembre 20	Leeward	15.6	0	0	0	0.153846	0.769231	0.0769231	0
123	Septiembre 20	Leeward	16	0	0	0	0	0.846154	0	0
124	Septiembre 20	Leeward	16.2	0	0	0	0.0769231	0.769231	0	0
125	Septiembre 20	Leeward	16.3	0	0	0	0	0.923077	0	0
126	Septiembre 20	Leeward	16.2	0	0	0	0.0769231	0.846154	0	0
127	Septiembre 20	Leeward	16.5	0	0	0	0	0.923077	0	0
128	Septiembre 20	Leeward	16.7	0	0	0	0	0.846154	0	0
129	Agosto 16	Windward	17.7	0	0	0	0.0769231	0.846154	0	0
130	Agosto 16	Windward	17.2	0	0	0	0.0769231	0.384615	0	0
131	Agosto 16	Windward	17.3	0	0	0	0	0.769231	0	0
132	Agosto 16	Windward	17.3	0	0	0	0	0.153846	0	0
133	Agosto 16	Windward	16.8	0	0	0	0.153846	0.461538	0	0
134	Agosto 16	Windward	16.1	0	0	0	0.0769231	0.692308	0	0
135	Agosto 16	Windward	14.9	0	0	0	0.0769231	0.769231	0.0769231	0
136	Agosto 16	Windward	13.1	0	0	0	0.230769	0.538462	0	0
137	Agosto 16	Windward	12	0	0	0	0.153846	0.615385	0	0
138	Agosto 16	Windward	10.4	0	0.230769	0.230769	0	0	0.0769231	0.461538
139	Agosto 16	Crest	8	0	0.0769231	0.0769231	0.230769	0.0769231	0.0769231	0.461538
140	Agosto 16	Crest	6.9	0	0	0	0.461538	0.0769231	0.1538	0.0769231
141	Agosto 16	Crest	6.7	0	0	0	0.384615	0.153846	0.153846	0
142	Agosto 16	Crest	6.3	0	0	0	0.692308	0.230769	0.0769231	0
143	Agosto 16	Crest	6	0	0	0	0.615385	0.153846	0	0.0769231
144	Agosto 16	Crest	7.2	0	0.0769231	0.0769231	0.384615	0.307692	0.0769231	0.0769231
145	Agosto 16	Crest	6	0	0	0	0.461538	0.384615	0.0769231	0
146	Agosto 16	Crest	6	0	0	0	0.384615	0.0769231	0.0769231	0.230769
147	Agosto 16	Crest	6.1	0	0	0	0.615385	0.230769	0	0.0769231
148	Agosto 16	Crest	5.7	0	0	0	0.615385	0.230769	0.0769231	0.0769231
149	Agosto 16	Crest	8.3	0	0	0	0.692308	0.153846	0	0.153846
150	Agosto 16	Crest	6.4	0	0.0769231	0.0769231	0.0769231	0.307692	0.2308	0
151	Agosto 16	Crest	6.6	0	0	0	0.0769231	0.153846	0.2308	0
152	Agosto 16	Crest	7.3	0.0769231	0	0.0769231	0.538462	0.153846	0	0
153	Agosto 16	Crest	8.1	0	0	0	0.846154	0.153846	0	0
154	Agosto 16	Crest	8.6	0	0	0	0.846154	0.153846	0	0
155	Agosto 16	Leeward	9.9	0	0	0	0.461538	0.461538	0	0
156	Agosto 16	Leeward	11.1	0	0	0	0.461538	0.384615	0.0769231	0
157	Agosto 16	Leeward	12.9	0	0	0	0.0769231	0.692308	0	0
158	Agosto 16	Leeward	13.4	0	0	0	0.230769	0.615385	0.0769231	0
159	Agosto 16	Leeward	13.6	0	0	0	0.384615	0.230769	0.0769231	0
160	Agosto 16	Leeward	14	0	0	0	0.384615	0.307692	0	0
161	Agosto 16	Leeward	14.5	0	0	0	0.230769	0.692308	0	0
162	Agosto 16	Leeward	15.1	0	0	0	0.0769231	0.923077	0	0
163	Agosto 16	Leeward	15.6	0.230769	0	0.230769	0.0769231	0.615385	0	0
164	Agosto 16	Leeward	15.7	0	0	0	0.153846	0.846154	0	0
165	Agosto 16	Leeward	15.9	0	0	0	0	0.923077	0	0
166	Agosto 16	Leeward	16.3	0	0	0	0	0.692308	0	0
167	Agosto 16	Leeward	16.3	0	0	0	0	0.923077	0	0
168	Agosto 16	Leeward	16.1	0	0	0	0	0.923077	0	0
169	Agosto 16	Leeward	16.5	0	0	0	0	1	0	0
170	Septiembre 4	Windward	18.5	0	0	0	0	0.769231	0	0
171	Septiembre 4	Windward	18.3	0	0	0	0	0.461538	0	0
172	Septiembre 4	Windward	18.3	0	0	0	0	0.461538	0	0
173	Septiembre 4	Windward	17.7	0	0	0	0	0.846154	0	0
174	Septiembre 4	Windward	17.8	0	0	0	0	0.461538	0	0
175	Septiembre 4	Windward	17.8	0	0	0	0	0.538462	0	0
176	Septiembre 4	Windward	17.5	0	0	0	0	0.538462	0	0
177	Septiembre 4	Windward	17.3	0	0	0	0	0.384615	0	0
178	Septiembre 4	Windward	17.2	0	0	0	0	0.461538	0	0
179	Septiembre 4	Windward	17.2	0	0	0	0.153846	0.461538	0	0
180	Septiembre 4	Windward	14.7	0.153846	0	0.153846	0.0769231	0.461538	0	0
181	Septiembre 4	Windward	14.4	0.0769231	0	0.0769231	0.153846	0.384615	0	0
182	Septiembre 4	Windward	11.7	0	0	0	0.153846	0.692308	0	0
183	Septiembre 4	Windward	11.2	0	0	0	0.461538	0.461538	0	0
184	Septiembre 4	Windward	9.2	0	0.307692	0.307692	0.230769	0.307692	0.0769231	0.0769231
185	Septiembre 4	Crest	7.7	0	0	0	0.538462	0.307692	0.1538	0
186	Septiembre 4	Crest	5.9	0	0	0	0.0769231	0.461538	0.2308	0.0769231
187	Septiembre 4	Crest	5.4	0	0	0	0.153846	0.692308	0.153846	0
188	Septiembre 4	Crest	5.5	0	0	0	0.230769	0.692308	0.0769231	0
189	Septiembre 4	Crest	5.9	0	0	0	0.230769	0.307692	0.0769231	0.384615
190	Septiembre 4	Crest	5.2	0	0.0769231	0.0769231	0.384615	0.461538	0.0769231	0
191	Septiembre 4	Crest	6.7	0	0.0769231	0.0769231	0.384615	0.230769	0.0769231	0.230769
192	Septiembre 4	Crest	7.5	0	0	0	0.461538	0.538462	0	0
193	Septiembre 4	Crest	5.3	0	0	0	0.153846	0.538462	0.0769231	0
194	Septiembre 4	Crest	6.9	0	0	0	0.230769	0.0769231	0.0769231	0.615385
195	Septiembre 4	Crest	6	0	0.0769231	0.0769231	0.0769231	0.615385	0	0
196	Septiembre 4	Leeward	8.2	0	0	0	0.384615	0.384615	0	0
197	Septiembre 4	Leeward	8.8	0	0	0	0.461538	0.384615	0	0
198	Septiembre 4	Leeward	9.7	0	0	0	0.461538	0.230769	0	0
199	Septiembre 4	Leeward	12.1	0	0	0	0.153846	0.384615	0	0
200	Septiembre 4	Leeward	12.8	0	0	0	0.0769231	0.692308	0	0
201	Septiembre 4	Leeward	13.3	0	0	0	0.153846	0.384615	0	0
202	Septiembre 4	Leeward	12.7	0	0	0	0	0.538462	0	0
203	Septiembre 4	Leeward	13.2	0	0	0	0.0769231	0.769231	0	0
204	Septiembre 4	Leeward	13.7	0	0	0	0.0769231	0.692308	0	0
205	Septiembre 4	Leeward	14.5	0	0	0	0.153846	0.461538	0	0
206	Septiembre 4	Leeward	14.9	0	0	0	0.153846	0.692308	0	0
207	Septiembre 4	Leeward	15	0	0	0	0.0769231	0.615385	0	0
208	Septiembre 4	Leeward	15.1	0.0769231	0	0.0769231	0.153846	0.461538	0	0
209	Septiembre 4	Leeward	15.3	0.0769231	0	0.0769231	0	0.307692	0	0
210	Septiembre 4	Leeward	15.4	0.0769231	0	0.0769231	0	0	0	0
211	Septiembre 4	Leeward	15.5	0	0	0	0	0	0	0
212	Septiembre 4	Leeward	15.6	0	0	0	0	0	0	0
213	Agosto 14	Windward	17.6	0	0	0	0	0.538462	0	0
214	Agosto 14	Windward	17.5	0	0	0	0	0.538462	0	0
215	Agosto 14	Windward	16.2	0	0	0	0.153846	0.692308	0	0
216	Agosto 14	Windward	15.4	0	0	0	0.153846	0.769231	0	0
217	Agosto 14	Windward	14.4	0	0	0	0.230769	0.384615	0.0769231	0
218	Agosto 14	Windward	13.5	0	0	0	0.230769	0.384615	0.0769231	0
219	Agosto 14	Windward	12.1	0	0.0769231	0.0769231	0.230769	0.384615	0	0
220	Agosto 14	Windward	10.6	0	0.0769231	0.0769231	0.230769	0.538462	0	0
221	Agosto 14	Windward	9.4	0	0.230769	0.230769	0.153846	0.307692	0	0.0769231
222	Agosto 14	Crest	10	0	0	0	0.538462	0.230769	0	0
223	Agosto 14	Crest	10	0	0.153846	0.153846	0.384615	0	0	0
224	Agosto 14	Crest	9.2	0	0	0	0.538462	0.307692	0	0.153846
225	Agosto 14	Crest	7.4	0	0	0	1	0	0	0
226	Agosto 14	Crest	7.6	0	0	0	0.461538	0.230769	0.0769231	0.230769
227	Agosto 14	Crest	6.6	0	0.153846	0.153846	0.692308	0.153846	0	0
228	Agosto 14	Crest	7.2	0	0	0	0.230769	0.461538	0.1538	0
229	Agosto 14	Crest	7	0	0	0	0.692308	0.153846	0	0.153846
230	Agosto 14	Crest	7.3	0	0	0	0.692308	0.307692	0	0
231	Agosto 14	Crest	7.6	0	0	0	0.769231	0.230769	0	0
232	Agosto 14	Crest	6.6	0	0	0	0.538462	0.307692	0	0.0769231
233	Agosto 14	Crest	5.4	0	0.0769231	0.0769231	0.230769	0.307692	0	0.0769231
234	Agosto 14	Crest	5.7	0	0	0	0.307692	0.307692	0	0
235	Agosto 14	Crest	5.6	0	0.0769231	0.0769231	0.384615	0.230769	0.0769231	0.0769231
236	Agosto 14	Crest	6.1	0	0.0769231	0.0769231	0.461538	0.307692	0.0769231	0.0769231
237	Agosto 14	Crest	6	0	0	0	0.615385	0.153846	0	0.0769231
238	Agosto 14	Crest	6.3	0	0.0769231	0.0769231	0.769231	0.0769231	0	0.0769231
239	Agosto 14	Crest	7.2	0	0	0	0.846154	0.153846	0	0
240	Agosto 14	Leeward	8.1	0	0	0	0.307692	0.0769231	0	0
241	Agosto 14	Leeward	9.4	0.692308	0	0.692308	0	0	0.3077	0
242	Agosto 14	Leeward	10.5	0	0	0	0.307692	0.384615	0	0
243	Agosto 14	Leeward	12.9	0	0	0	0.307692	0.307692	0	0
244	Agosto 14	Leeward	13.3	0	0	0	0.230769	0.384615	0.0769231	0
245	Agosto 14	Leeward	13.6	0	0	0	0.0769231	0.307692	0	0
246	Agosto 14	Leeward	13.6	0	0	0	0.0769231	0.461538	0	0
247	Agosto 14	Leeward	14.4	0	0	0	0.0769231	0.846154	0	0
248	Agosto 14	Leeward	14.8	0	0	0	0	0.923077	0	0
249	Agosto 14	Leeward	15.5	0	0	0	0	0.923077	0	0
250	Agosto 14	Leeward	15.7	0	0	0	0	0.923077	0	0
251	Agosto 14	Leeward	15.9	0	0	0	0	0.923077	0	0
252	Agosto 14	Leeward	16	0	0	0	0	0.769231	0	0
253	Agosto 14	Leeward	16	0	0	0	0.0769231	0.846154	0	0
254	Septiembre 28	Windward	17.8	0	0	0	0	0.846154	0	0
255	Septiembre 28	Windward	17.7	0	0	0	0	0.923077	0	0
256	Septiembre 28	Windward	17.5	0	0	0	0	0.692308	0	0
257	Septiembre 28	Windward	17.2	0	0	0	0.0769231	0.538462	0	0
258	Septiembre 28	Windward	17.1	0	0	0	0.0769231	0.692308	0	0
259	Septiembre 28	Windward	16.9	0	0	0	0.0769231	0.538462	0	0
260	Septiembre 28	Windward	16.6	0	0	0	0.0769231	0.692308	0	0
261	Septiembre 28	Windward	16.7	0	0	0	0.0769231	0.461538	0	0
262	Septiembre 28	Windward	16.3	0	0	0	0.0769231	0.692308	0	0
263	Septiembre 28	Windward	15.3	0	0	0	0.230769	0.615385	0	0
264	Septiembre 28	Windward	14.4	0	0	0	0.230769	0.538462	0	0
265	Septiembre 28	Windward	13.5	0	0	0	0.307692	0.461538	0	0
266	Septiembre 28	Windward	11.5	0	0.0769231	0.0769231	0.0769231	0.769231	0	0
267	Septiembre 28	Windward	10.1	0	0.153846	0.153846	0.307692	0.538462	0	0
268	Septiembre 28	Crest	8.8	0	0.461538	0.461538	0.230769	0.153846	0.0769231	0.0769231
269	Septiembre 28	Crest	7.6	0	0	0	0.384615	0.461538	0.153846	0
270	Septiembre 28	Crest	7.8	0.0769231	0.0769231	0.153846	0.384615	0.307692	0.0769231	0.0769231
271	Septiembre 28	Crest	7.5	0	0.230769	0.230769	0.461538	0.307692	0	0
272	Septiembre 28	Crest	5.5	0	0	0	0.384615	0.615385	0	0
273	Septiembre 28	Crest	5.6	0	0.0769231	0.0769231	0.384615	0.461538	0	0.0769231
274	Septiembre 28	Crest	5.9	0	0.0769231	0.0769231	0.307692	0.538462	0	0.0769231
275	Septiembre 28	Crest	6.4	0	0.0769231	0.0769231	0.538462	0.307692	0	0.0769231
276	Septiembre 28	Crest	6.5	0	0	0	0.307692	0.615385	0	0
277	Septiembre 28	Crest	7.1	0	0	0	0.538462	0.307692	0.0769231	0.0769231
278	Septiembre 28	Crest	6.7	0	0	0	0.461538	0.307692	0.0769231	0.153846
279	Septiembre 28	Crest	7	0	0	0	0.615385	0.230769	0.0769231	0.0769231
280	Septiembre 28	Crest	5.2	0	0	0	0.307692	0.384615	0.0769231	0.153846
281	Septiembre 28	Crest	5.2	0	0.0769231	0.0769231	0.461538	0.461538	0	0
282	Septiembre 28	Crest	5.1	0	0	0	0.384615	0.384615	0.0769231	0.0769231
283	Septiembre 28	Crest	5.1	0	0	0	0.461538	0.538462	0	0
284	Septiembre 28	Crest	6.6	0	0.0769231	0.0769231	0.615385	0.230769	0	0.0769231
285	Septiembre 28	Crest	7.4	0	0	0	0.615385	0.230769	0	0.0769231
286	Septiembre 28	Crest	8.3	0	0	0	0.538462	0.230769	0	0
287	Septiembre 28	Leeward	9.3	0	0	0	0.384615	0.230769	0	0
288	Septiembre 28	Leeward	9.9	0	0	0	0.461538	0.230769	0	0
289	Septiembre 28	Leeward	10.9	0	0	0	0.307692	0.0769231	0	0
290	Septiembre 28	Leeward	11.9	0	0	0	0.307692	0.461538	0	0
291	Septiembre 28	Leeward	12.6	0	0	0	0.0769231	0.384615	0.0769231	0
292	Septiembre 28	Leeward	13.3	0	0	0	0.230769	0.384615	0	0
293	Septiembre 28	Leeward	14	0	0	0	0.153846	0.384615	0	0
294	Septiembre 28	Leeward	14.5	0	0	0	0.0769231	0.538462	0	0
295	Septiembre 28	Leeward	14.6	0	0	0	0	0.769231	0	0
296	Septiembre 28	Leeward	14.8	0	0	0	0.0769231	0.692308	0	0
297	Septiembre 28	Leeward	15	0	0	0	0.0769231	0.846154	0	0
298	Agosto 27	Windward	18.5	0	0	0	0	0.692308	0	0
299	Agosto 27	Windward	18.5	0	0	0	0.0769231	0.307692	0	0
300	Agosto 27	Windward	18.4	0	0	0	0	0.461538	0	0
301	Agosto 27	Windward	18.2	0	0	0	0	0.769231	0	0
302	Agosto 27	Windward	17.8	0	0	0	0	0.846154	0	0
303	Agosto 27	Windward	17.3	0	0	0	0	0.769231	0	0
304	Agosto 27	Windward	16.6	0	0	0	0	0.846154	0	0
305	Agosto 27	Windward	16.4	0	0	0	0	0.461538	0	0
306	Agosto 27	Windward	16.1	0	0	0	0	0	0	0
307	Agosto 27	Windward	16.2	0	0	0	0	0	0	0
308	Agosto 27	Windward	15.8	0	0	0	0	0	0	0
309	Agosto 27	Windward	15.7	0	0	0	0	0	0	0
310	Agosto 27	Windward	15.4	0	0	0	0	0.0769231	0	0
311	Agosto 27	Windward	15	0	0	0	0	0	0	0
312	Agosto 27	Windward	13.7	0	0	0	0	0.153846	0	0
313	Agosto 27	Windward	13.4	0	0	0	0	0.0769231	0	0
314	Agosto 27	Windward	11.5	0	0	0	0.0769231	0.769231	0.0769231	0
315	Agosto 27	Windward	10	0	0	0	0	0.769231	0	0
316	Agosto 27	Crest	7.1	0	0	0	0	0	0.1538	0.153846
317	Agosto 27	Crest	7.7	0	0	0	0.538462	0.0769231	0.1538	0
318	Agosto 27	Crest	5.8	0	0.153846	0.153846	0.384615	0.230769	0.1538	0
319	Agosto 27	Crest	6	0	0	0	0.384615	0.461538	0.0769231	0
320	Agosto 27	Crest	7.3	0.0769231	0.0769231	0.153846	0.307692	0.230769	0.0769231	0.230769
321	Agosto 27	Leeward	9.2	0	0	0	0.307692	0.461538	0	0
322	Agosto 27	Leeward	9.8	0	0	0	0.230769	0.538462	0	0
323	Agosto 27	Leeward	10.1	0	0	0	0.307692	0.538462	0	0
324	Agosto 27	Leeward	11.7	0	0	0	0	1	0	0
325	Agosto 27	Leeward	12.6	0	0	0	0.153846	0.769231	0	0
326	Agosto 27	Leeward	13.1	0	0	0	0.0769231	0.846154	0	0
327	Agosto 27	Leeward	13.8	0	0	0	0.0769231	0.769231	0	0
328	Agosto 27	Leeward	14.6	0	0	0	0.0769231	0.846154	0	0
329	Agosto 27	Leeward	14.8	0	0	0	0	0.923077	0	0
330	Agosto 27	Leeward	15.4	0	0	0	0	0.0769231	0	0
331	Agosto 27	Leeward	15.3	0	0	0	0.0769231	0.846154	0	0
332	Agosto 27	Leeward	15.4	0	0	0	0	0.692308	0	0
333	Agosto 27	Leeward	15.5	0	0	0	0	0.846154	0	0
334	Septiembre 11	Windward	17.4	0	0	0	0	0.769231	0	0
335	Septiembre 11	Windward	17.2	0	0	0	0	0.846154	0	0
336	Septiembre 11	Windward	17	0	0	0	0	0.923077	0	0
337	Septiembre 11	Windward	16.8	0	0	0	0	0.692308	0	0
338	Septiembre 11	Windward	16.5	0	0	0	0	0.846154	0	0
339	Septiembre 11	Windward	16.1	0	0	0	0	0.692308	0	0
340	Septiembre 11	Windward	16.1	0	0	0	0	0.461538	0.3077	0
341	Septiembre 11	Windward	15.5	0	0	0	0	0.692308	0	0
342	Septiembre 11	Windward	14.9	0	0	0	0	0.769231	0	0
343	Septiembre 11	Windward	13.4	0.0769231	0	0.0769231	0.0769231	0.692308	0	0
344	Septiembre 11	Windward	10.7	0	0.153846	0.153846	0.153846	0.615385	0	0
345	Septiembre 11	Windward	9.7	0	0.153846	0.153846	0	0.692308	0	0.153846
346	Septiembre 11	Crest	7.2	0	0	0	0	0.846154	0.0769231	0
347	Septiembre 11	Crest	6.1	0	0.0769231	0.0769231	0.384615	0.461538	0.0769231	0
348	Septiembre 11	Crest	5.5	0	0	0	0.153846	0.769231	0.0769231	0
349	Septiembre 11	Crest	5.8	0	0	0	0.153846	0.769231	0	0
350	Septiembre 11	Crest	7.3	0	0	0	0.384615	0.538462	0	0
351	Septiembre 11	Crest	10.5	0	0	0	0.230769	0.153846	0	0
352	Septiembre 11	Crest	8.5	0	0	0	0.384615	0.461538	0.0769231	0
353	Septiembre 11	Leeward	10.4	0	0	0	0.153846	0.692308	0	0
354	Septiembre 11	Leeward	10.8	0	0	0	0.153846	0.769231	0	0
355	Septiembre 11	Leeward	11.2	0	0	0	0.153846	0.538462	0	0
356	Septiembre 11	Leeward	12.5	0	0	0	0	0.769231	0	0
357	Septiembre 11	Leeward	13.6	0	0	0	0	0.692308	0	0
358	Septiembre 11	Leeward	13.9	0	0	0	0.0769231	0.769231	0.0769231	0
359	Septiembre 11	Leeward	14	0	0	0	0	0.615385	0	0
360	Septiembre 11	Leeward	15.9	0.0769231	0	0.0769231	0	0.769231	0	0
361	Septiembre 11	Leeward	16.7	0	0	0	0.0769231	0.461538	0	0
362	Septiembre 11	Leeward	16.9	0	0	0	0	0.384615	0	0
363	Septiembre 11	Leeward	17.3	0	0	0	0	0.153846	0	0
364	Septiembre 11	Leeward	17.2	0	0	0	0	0.615385	0	0
365	Septiembre 11	Leeward	17.1	0	0	0	0.0769231	0.769231	0	0
366	Septiembre 11	Leeward	17.2	0	0	0	0	0.846154	0	0
367	Septiembre 11	Leeward	17.2	0	0	0	0.0769231	0.692308	0	0
368	Septiembre 11	Leeward	17.1	0	0	0	0	0.846154	0	0
369	Septiembre 11	Leeward	16.4	0.0769231	0	0.0769231	0.153846	0.692308	0	0
370	Septiembre 11	Leeward	16.3	0	0	0	0	0.923077	0	0
371	Septiembre 11	Leeward	16	0	0	0	0.0769231	0.692308	0	0
372	Septiembre 11	Leeward	16	0	0	0	0	0.769231	0	0
373	Septiembre 11	Leeward	16.2	0	0	0	0	0.615385	0	0
374	Septiembre 11	Leeward	16.1	0	0	0	0	0.846154	0	0
375	Septiembre 11	Leeward	16.5	0	0	0	0	0.923077	0	0
376	Septiembre 11	Leeward	16.5	0	0	0	0	0.769231	0	0
377	Septiembre 11	Leeward	16.4	0.0769231	0	0.0769231	0.0769231	0.692308	0	0
378	Agosto 9	Windward	18.3	0	0	0	0	1	0	0
379	Agosto 9	Windward	18.3	0	0	0	0	0.923077	0	0
380	Agosto 9	Windward	17.9	0	0	0	0	0.846154	0	0
381	Agosto 9	Windward	17.3	0	0	0	0	0.846154	0	0
382	Agosto 9	Windward	17.3	0	0	0	0	0.769231	0	0
383	Agosto 9	Windward	17.3	0	0	0	0	0.846154	0	0
384	Agosto 9	Windward	16.7	0	0	0	0	0.846154	0	0
385	Agosto 9	Windward	16.4	0	0	0	0	0.846154	0	0
386	Agosto 9	Windward	15.2	0	0	0	0.0769231	0.769231	0	0
387	Agosto 9	Windward	14.1	0	0	0	0.0769231	0.692308	0	0
388	Agosto 9	Windward	13.9	0	0.153846	0.153846	0	0.692308	0	0
389	Agosto 9	Windward	13.4	0	0.0769231	0.0769231	0	0.307692	0	0.307692
390	Agosto 9	Windward	11.6	0	0.230769	0.230769	0	0.769231	0	0
391	Agosto 9	Windward	10.6	0	0	0	0.0769231	0.538462	0.153846	0.0769231
392	Agosto 9	Crest	7	0	0.0769231	0.0769231	0.461538	0.307692	0.0769231	0.0769231
393	Agosto 9	Crest	6.4	0	0	0	0.384615	0.461538	0.0769231	0
394	Agosto 9	Crest	5.8	0	0	0	0.384615	0.538462	0.0769231	0
395	Agosto 9	Crest	5.8	0	0	0	0.230769	0.692308	0	0.0769231
396	Agosto 9	Crest	6.1	0	0	0	0.384615	0.538462	0	0
397	Agosto 9	Crest	5.8	0	0.0769231	0.0769231	0.384615	0.461538	0.0769231	0
398	Agosto 9	Crest	5.8	0	0	0	0.307692	0.384615	0	0
399	Agosto 9	Crest	7	0	0	0	0.307692	0.461538	0.0769231	0.153846
400	Agosto 9	Crest	7.6	0	0	0	0.153846	0.615385	0	0
401	Agosto 9	Crest	7.9	0	0	0	0.538462	0.384615	0	0
402	Agosto 9	Crest	8.8	0	0	0	0.384615	0.230769	0.0769231	0
403	Agosto 9	Sotavento	10	0	0	0	0.384615	0.230769	0	0
404	Agosto 9	Sotavento	11.2	0	0	0	0.0769231	0.769231	0	0
405	Agosto 9	Sotavento	13.1	0	0	0	0	0.461538	0	0
406	Agosto 9	Sotavento	14	0	0	0	0	0.769231	0	0
407	Agosto 9	Sotavento	13.7	0	0	0	0.0769231	0.769231	0	0
408	Septiembre 13-20	Windward	18.3	0	0	0	0	0.923077	0	0
409	Septiembre 13-20	Windward	17.9	0	0	0	0	0.692308	0.1538	0
410	Septiembre 13-20	Windward	17.8	0.0769231	0	0.0769231	0	0.769231	0	0
411	Septiembre 13-20	Windward	17.8	0	0	0	0	0.846154	0	0
412	Septiembre 13-20	Windward	17.7	0.0769231	0	0.0769231	0	0.384615	0	0
413	Septiembre 13-20	Windward	17.4	0	0	0	0	0.461538	0	0
414	Septiembre 13-20	Windward	17.3	0	0	0	0.0769231	0.538462	0	0
415	Septiembre 13-20	Windward	17	0	0	0	0	0.692308	0	0
416	Septiembre 13-20	Windward	16.8	0	0	0	0	0.692308	0	0
417	Septiembre 13-20	Windward	16.7	0	0	0	0	0.692308	0	0
418	Septiembre 13-20	Windward	16.5	0	0	0	0	0.692308	0	0
419	Septiembre 13-20	Windward	16	0	0	0	0.0769231	0.692308	0	0
420	Septiembre 13-20	Windward	15.3	0	0	0	0.153846	0.769231	0	0
421	Septiembre 13-20	Windward	14.7	0	0	0	0.230769	0.692308	0	0
422	Septiembre 13-20	Windward	14.1	0	0	0	0.230769	0.692308	0	0
423	Septiembre 13-20	Windward	13.2	0	0	0	0.230769	0.615385	0	0
424	Septiembre 13-20	Windward	12	0	0	0	0.230769	0.384615	0	0
425	Septiembre 13-20	Windward	11.3	0	0.230769	0.230769	0.307692	0.230769	0	0
426	Septiembre 13-20	Windward	8.5	0	0	0	0.230769	0.461538	0.1538	0
427	Septiembre 13-20	Crest	7	0	0.0769231	0.0769231	0.307692	0.384615	0.230723	0
428	Septiembre 13-20	Crest	7.4	0	0.0769231	0.0769231	0.461538	0.230769	0.0769231	0.0769231
429	Septiembre 13-20	Crest	6.1	0	0.230769	0.230769	0.153846	0.307692	0.0769231	0.230769
430	Septiembre 13-20	Crest	5.5	0	0.0769231	0.0769231	0.307692	0.384615	0.1538	0.0769231
431	Septiembre 13-20	Crest	6.5	0	0	0	0.692308	0.153846	0	0.0769231
432	Septiembre 13-20	Crest	6	0	0	0	0.538462	0.384615	0.0769231	0
433	Septiembre 13-20	Crest	8.4	0	0	0	0.769231	0.0769231	0.0769231	0
434	Septiembre 13-20	Leeward	10.1	0	0	0	0.230769	0.230769	0	0
435	Septiembre 13-20	Leeward	11.9	0.0769231	0	0.0769231	0.0769231	0.615385	0	0
436	Septiembre 13-20	Leeward	12.9	0	0	0	0.153846	0.307692	0	0
437	Septiembre 13-20	Leeward	13	0	0	0	0	0.538462	0.0769231	0
438	Septiembre 13-20	Leeward	13	0	0	0	0.153846	0.692308	0	0
439	Septiembre 13-20	Leeward	13.3	0	0	0	0.307692	0.615385	0	0
440	Septiembre 13-20	Leeward	13.6	0	0	0	0.230769	0.692308	0	0
441	Septiembre 13-20	Leeward	13.8	0	0	0	0.153846	0.692308	0	0
442	Septiembre 13-20	Leeward	13.9	0	0	0	0.0769231	0.769231	0	0
443	Septiembre 13-20	Leeward	14.1	0	0	0	0.153846	0.692308	0	0
444	Septiembre 13-20	Leeward	14.1	0	0	0	0.0769231	0.692308	0	0
445	Septiembre 13-20	Leeward	14.1	0	0	0	0.153846	0.769231	0	0
446	Septiembre 13-20	Leeward	14.1	0	0	0	0.153846	0.769231	0	0
447	Septiembre 13-20	Leeward	14.2	0	0	0	0.0769231	0.846154	0	0
448	Septiembre 13-20	Leeward	14.1	0	0	0	0.0769231	0.846154	0	0
449	Septiembre 13-20	Leeward	13.9	0	0	0	0.0769231	0.769231	0	0
450	Septiembre 13-20	Leeward	14	0	0	0	0.153846	0.692308	0	0
451	Octubre 8	Windward	18.3	0	0	0	0	0.461538	0	0
452	Octubre 8	Windward	18.1	0	0	0	0	0.692308	0	0
453	Octubre 8	Windward	17.7	0	0	0	0	0.692308	0	0
454	Octubre 8	Windward	17.5	0	0	0	0.0769231	0.538462	0	0
455	Octubre 8	Windward	17.4	0	0	0	0	0.461538	0	0
456	Octubre 8	Windward	17.4	0	0	0	0	0.461538	0	0
457	Octubre 8	Windward	17.2	0	0	0	0.0769231	0.461538	0	0
458	Octubre 8	Windward	17.2	0	0	0	0	0.769231	0	0
459	Octubre 8	Windward	16.8	0	0	0	0.0769231	0.692308	0	0
460	Octubre 8	Windward	16.7	0	0	0	0.0769231	0.615385	0	0
461	Octubre 8	Windward	16.5	0	0	0	0.153846	0.538462	0	0
462	Octubre 8	Windward	16.1	0	0	0	0.230769	0.538462	0	0
463	Octubre 8	Windward	15.4	0	0	0	0.230769	0.615385	0	0
464	Octubre 8	Windward	14.3	0	0	0	0.230769	0.692308	0	0
465	Octubre 8	Windward	13.2	0	0	0	0.230769	0.615385	0	0
466	Octubre 8	Windward	12	0	0	0	0.153846	0.692308	0	0
467	Octubre 8	Windward	10.8	0	0.0769231	0.0769231	0.461538	0.153846	0	0
468	Octubre 8	Crest	8.9	0	0	0	0	0.0769231	0	0.923077
469	Octubre 8	Crest	8.3	0	0.153846	0.153846	0.153846	0.692308	0	0
470	Octubre 8	Crest	7.4	0	0.153846	0.153846	0.307692	0.384615	0	0
471	Octubre 8	Crest	6.3	0	0	0	0.461538	0.461538	0.0769231	0
472	Octubre 8	Crest	6.3	0	0	0	0.692308	0.307692	0	0
473	Octubre 8	Crest	6.3	0	0	0	0.230769	0.153846	0.0769231	0.461538
474	Octubre 8	Crest	7.2	0	0.0769231	0.0769231	0.538462	0.153846	0.0769231	0.153846
475	Octubre 8	Crest	7.1	0	0	0	0.307692	0.230769	0.0769231	0.0769231
476	Octubre 8	Leeward	10	0.0769231	0	0.0769231	0.384615	0	0	0
477	Octubre 8	Leeward	10.5	0	0	0	0.384615	0	0	0
478	Octubre 8	Leeward	11.4	0	0	0	0.384615	0	0	0
479	Octubre 8	Leeward	13.2	0	0	0	0.153846	0.461538	0	0
480	Octubre 8	Leeward	13.7	0	0	0	0.153846	0.384615	0	0
481	Octubre 8	Leeward	13.8	0	0	0	0.153846	0.461538	0	0
482	Octubre 8	Leeward	14.2	0	0	0	0.153846	0.615385	0	0
483	Octubre 8	Leeward	14.3	0	0	0	0.153846	0.615385	0	0
484	Octubre 8	Leeward	14.9	0	0	0	0.153846	0.615385	0	0
485	Octubre 8	Leeward	15	0	0	0	0.230769	0.461538	0	0
486	Octubre 8	Leeward	14.9	0	0	0	0.153846	0.461538	0	0
487	Octubre 8	Leeward	14.8	0	0	0	0.230769	0.461538	0	0
488	Octubre 8	Leeward	15.3	0	0	0	0.230769	0.538462	0	0
489	Octubre 8	Leeward	14.9	0	0	0	0.153846	0.538462	0	0
490	Octubre 8	Leeward	14.9	0	0	0	0.153846	0.538462	0	0
491	Octubre 8	Leeward	14.9	0	0	0	0.153846	0.461538	0	0
492	Octubre 8	Leeward	15.1	0	0	0	0.153846	0.461538	0	0
493	Octubre 8	Leeward	15.2	0.0769231	0	0.0769231	0.153846	0.461538	0	0
494	Octubre 8	Leeward	15.4	0	0	0	0.0769231	0.461538	0	0
495	Septiembre 13	Windward	19.1	0	0	0	0	0.384615	0	0
496	Septiembre 13	Windward	18.8	0	0	0	0	0.615385	0	0
497	Septiembre 13	Windward	18.8	0	0	0	0	0.692308	0	0
498	Septiembre 13	Windward	18.6	0	0	0	0	0.230769	0	0
499	Septiembre 13	Windward	18.5	0.0769231	0	0.0769231	0	0.538462	0	0
500	Septiembre 13	Windward	18.7	0	0	0	0	0.846154	0	0
501	Septiembre 13	Windward	17.8	0.0769231	0	0.0769231	0	0.846154	0	0
502	Septiembre 13	Windward	17.7	0	0	0	0	0.923077	0	0
503	Septiembre 13	Windward	17.6	0	0	0	0	0.923077	0	0
504	Septiembre 13	Windward	17.7	0	0	0	0	0.769231	0	0
505	Septiembre 13	Windward	17.4	0	0	0	0	0.769231	0	0
506	Septiembre 13	Windward	17.2	0	0	0	0	0.769231	0	0
507	Septiembre 13	Windward	17	0	0	0	0	0.307692	0	0
508	Septiembre 13	Windward	17	0	0	0	0	0.461538	0	0
509	Septiembre 13	Windward	16.7	0	0	0	0	0.769231	0	0
510	Septiembre 13	Windward	16.4	0	0	0	0	0.923077	0	0
511	Septiembre 13	Windward	16.2	0	0	0	0	1	0	0
512	Septiembre 13	Windward	16	0	0	0	0	1	0	0
513	Septiembre 13	Windward	15.9	0	0	0	0	1	0	0
514	Septiembre 13	Windward	15.6	0	0	0	0	0.307692	0	0
515	Septiembre 13	Windward	15.5	0	0	0	0	0.153846	0	0
516	Septiembre 13	Windward	14.9	0	0	0	0	0.846154	0	0
517	Septiembre 13	Windward	14.7	0	0	0	0	0.846154	0	0
518	Septiembre 13	Windward	13.2	0	0	0	0.0769231	0.846154	0	0
519	Septiembre 13	Windward	13	0	0	0	0.153846	0.769231	0	0
520	Septiembre 13	Windward	13.4	0	0	0	0.0769231	0.846154	0	0
521	Septiembre 13	Leeward	15	0	0	0	0	0.769231	0	0
522	Septiembre 13	Leeward	16.5	0	0	0	0	0.769231	0	0
523	Septiembre 13	Leeward	16.5	0	0	0	0.153846	0.692308	0	0
524	Septiembre 13	Leeward	17.3	0	0	0	0	0.461538	0	0
525	Septiembre 13	Leeward	16.8	0	0	0	0	0.923077	0	0
526	Septiembre 13	Leeward	17.1	0	0	0	0	0.923077	0	0
527	Septiembre 13	Leeward	17.6	0	0	0	0	0.846154	0	0
528	Septiembre 13	Leeward	17.5	0	0	0	0	0.923077	0	0
529	Septiembre 13	Leeward	18	0	0	0	0	0.846154	0	0
530	Septiembre 13	Leeward	17.9	0	0	0	0	0.769231	0	0
531	Septiembre 13	Leeward	17.9	0	0	0	0	0.538462	0	0
532	Septiembre 13	Leeward	16.7	0	0	0	0	0.846154	0	0
533	Septiembre 13	Leeward	16.7	0	0	0	0	0.923077	0	0
534	Septiembre 13	Leeward	16.7	0	0	0	0	0.846154	0	0
535	Septiembre 13	Leeward	16.6	0	0	0	0	1	0	0
536	Septiembre 13	Leeward	16.5	0	0	0	0	0.923077	0	0
537	Septiembre 13	Leeward	16.6	0	0	0	0	0.923077	0	0
538	Septiembre 13	Leeward	16.6	0	0	0	0	0.923077	0	0
539	Septiembre 3	Windward	19	0	0	0	0	0.0769231	0	0
540	Septiembre 3	Windward	18.8	0.0769231	0	0.0769231	0	0.153846	0	0
541	Septiembre 3	Windward	18.6	0.0769231	0	0.0769231	0	0.769231	0	0
542	Septiembre 3	Windward	18.4	0	0	0	0	0.846154	0	0
543	Septiembre 3	Windward	18.3	0.0769231	0	0.0769231	0	0.769231	0	0
544	Septiembre 3	Windward	18.2	0	0	0	0	0.923077	0	0
545	Septiembre 3	Windward	18	0.0769231	0	0.0769231	0	0.538462	0	0
546	Septiembre 3	Windward	17.7	0.0769231	0	0.0769231	0	0.846154	0	0
547	Septiembre 3	Windward	17.6	0	0	0	0	0.692308	0.1538	0
548	Septiembre 3	Windward	17.6	0	0	0	0	0.461538	0	0
549	Septiembre 3	Windward	17.4	0	0	0	0	0.769231	0	0
550	Septiembre 3	Windward	17.2	0	0	0	0	0.769231	0	0
551	Septiembre 3	Windward	17.1	0	0	0	0	1	0	0
552	Septiembre 3	Windward	17	0	0	0	0	0.846154	0	0
553	Septiembre 3	Windward	16.6	0	0	0	0	1	0	0
554	Septiembre 3	Windward	16.6	0	0	0	0	1	0	0
555	Septiembre 3	Windward	16.3	0	0	0	0	1	0	0
556	Septiembre 3	Windward	15.9	0	0	0	0	0.923077	0	0
557	Septiembre 3	Windward	15.5	0	0	0	0	0.846154	0	0
558	Septiembre 3	Windward	14.9	0	0	0	0	0.923077	0	0
559	Septiembre 3	Leeward	15.3	0	0	0	0	0.769231	0	0
560	Septiembre 3	Leeward	15	0	0	0	0	0.923077	0	0
561	Septiembre 3	Leeward	16.8	0	0	0	0	0	0	0
562	Septiembre 3	Leeward	18.5	0	0	0	0	0.230769	0	0
563	Septiembre 3	Leeward	18.4	0	0	0	0	0.0769231	0	0
564	Septiembre 3	Leeward	18.2	0	0	0	0	0.0769231	0	0
565	Septiembre 3	Leeward	18.1	0	0	0	0	0.384615	0	0
566	Septiembre 3	Leeward	17.9	0	0	0	0	0.384615	0	0
567	Septiembre 3	Leeward	17.3	0	0	0	0	0.846154	0	0
568	Septiembre 3	Leeward	17.1	0	0	0	0	0.846154	0	0
569	Septiembre 3	Leeward	17.1	0	0	0	0	0.923077	0	0
570	Septiembre 3	Leeward	17	0	0	0	0	0.923077	0	0
571	Septiembre 3	Leeward	17	0	0	0	0	1	0	0
572	Septiembre 3	Leeward	16.9	0	0	0	0	1	0	0
573	Septiembre 3	Leeward	16.9	0	0	0	0	1	0	0
574	Septiembre 3	Leeward	16.8	0	0	0	0	0.923077	0	0
575	Septiembre 3	Leeward	17.1	0	0	0	0	1	0	0
576	Septiembre 3	Leeward	17	0	0	0	0	1	0	0
577	Septiembre 3	Leeward	17.1	0	0	0	0	0.923077	0	0
578	Septiembre 3	Leeward	17	0	0	0	0	0.923077	0	0
579	Septiembre 3	Leeward	17.1	0	0	0	0	1	0	0
